# Supplementary material
Source: MDPI journal article supplement (https://www.mdpi.com/2077-0472/12/9/1486)
Supplement: s1 [file s1]

## Supplementary Materials

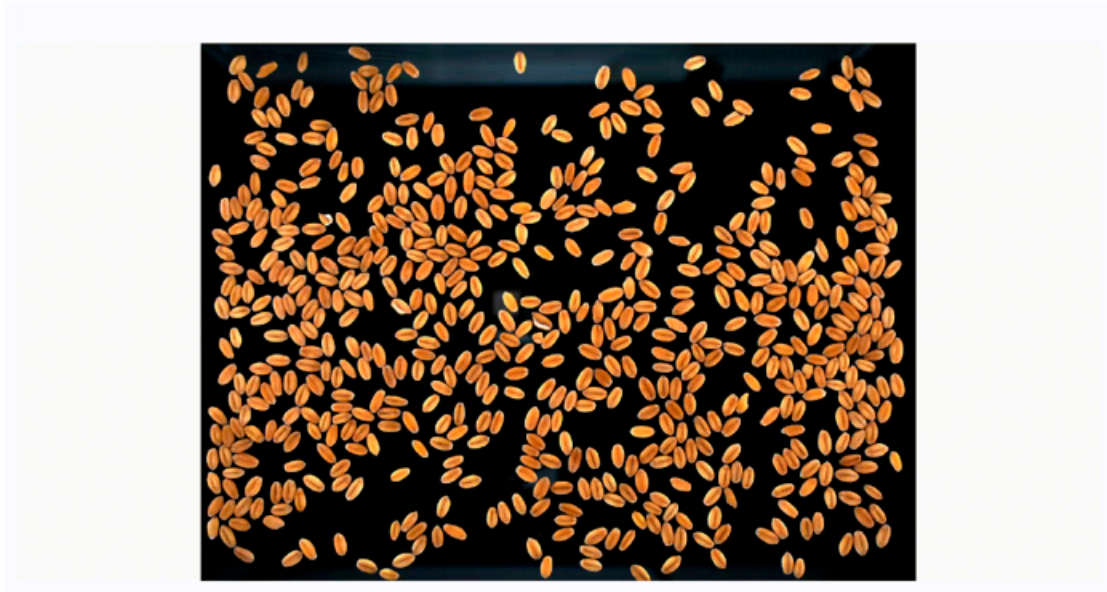

**Figure S1.** The dynamic processing and preservation processes of a wheat image using **MWES** method

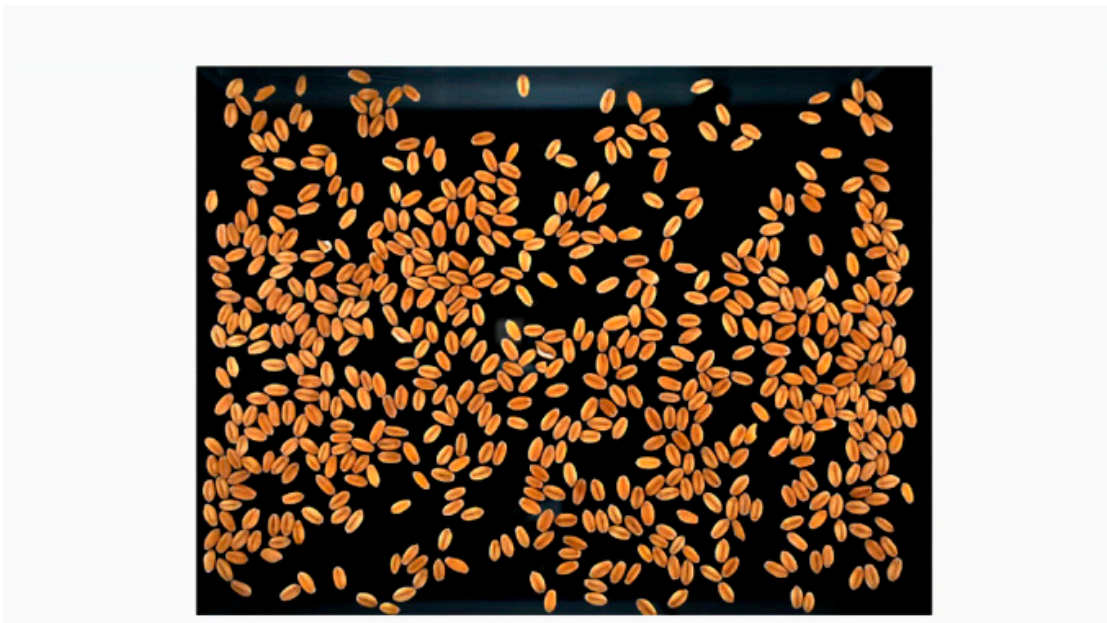

**Figure S2.** The dynamic processing and preservation processes of a wheat image using **MWES<sub>ic</sub>** method
